# Supplementary material
Source: PubMed Central journal article supplement (PMC2767163)
Supplement: NIHMS139181-supplement-fig.pdf [file NIHMS139181-supplement-fig.pdf]

Supplementary Figure 1

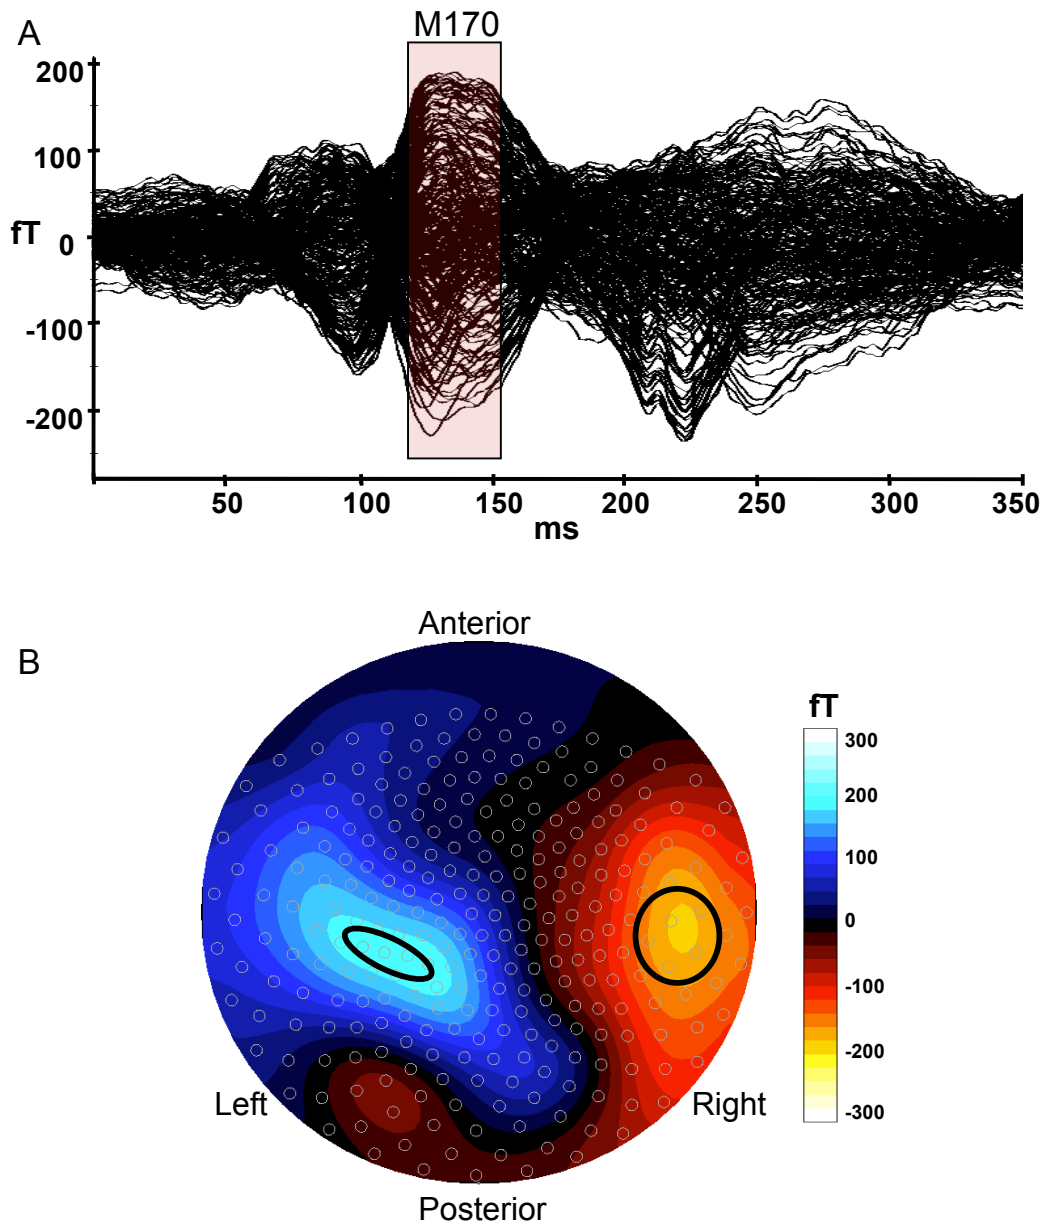

Identification of Face-Selective Sensors. A. Butterfly plot of all responses to all stimuli across all sensors for a representative subject. X-axis represents time in milliseconds (ms) after stimulus onset. Y-axis represents strength of magnetic field in femtoTesla (fT). B. Scalp distribution of the M170 response to faces (located from about 120 ms to about 150 ms after stimulus onset for this subject) with the most face-sensitive sensors in each hemisphere circled in black (4 on right and 4 on left). Colors represent strength of magnetic field in femtoTesla (fT), red: field into (sink), blue: field out (source)).
